# Supplementary material for: SARS-CoV-2 spike protein is a self-adjuvanted antigen for mucosal immunization and confers broad protection against lethal challenge with SARS-CoV-2 via intranasal vaccination
Source: Research Square preprint supplement (doi:10.21203/rs.3.rs-5736071/v1), 2025-03-19
Supplement: Supplementary file 1 [file 26811ab14a90aef56d887e16.docx]

**Supplementary Information**

**Supplementary figure legends**

**Figure S1. The immunogenicity of the spike protein produced from different protein expression systems.**

**A.** RBD-specific IgG titers in sera induced by intranasal immunization with the spike protein of the original SARS-CoV-2 strain expressed in CHO cells and 293 cells. **B.** RBD-specific IgG titers in sera induced by intranasal immunization with the spike protein of the original SARS-CoV-2 strain expressed in baculovirus-infected cells and CHO cells. The data are presented as the means ± SEMs. Groups were compared via one-way ANOVA. **P*<0.05, ****P*<0.001; ns, nonsignificant.

**Figure S2. The effectiveness and biocompatibility of LNT as a respiratory mucosal adjuvant.**

**A.** RBD-specific IgG titers in sera induced by intranasal immunization with spike protein together with different adjuvants after the 2nd immunization. **B.** RBD-specific IgG serum titers induced by intranasal immunization with spike protein with pre- or co-instillation of LNT. **C.** RBD-specific serum IgG titers induced by intranasal immunization with the spike protein together with different doses of LNT. **D.** Enriched pathways associated with genes in the lung tissues of mice intranasally instilled with LNT. **E.** Index of the lungs (lung weight/body weight) at 24 h post-immunization. **F.** H&E staining of the nasals and lungs at 24 h post-immunization (scale bars, 100 μm). The data are presented as the means ± SEMs. Groups were compared via one-way ANOVA. **P*<0.05; ** *P*<0.01; ns: nonsignificant.

**Figure S3. S1- or S2-specific IFN-γ-secreting T-cell responses of spleen cells.**

**A.** Representative images of the IFN-γ- and IL-17A-secreting T-cell responses of spleen cells stimulated with the S1 protein. **B.** Representative images of the IFN-γ- and IL-17A-secreting T-cell responses of spleen cells stimulated with the S2 protein.

**Figure S4. Neutralizing antibody titers against authentic SARS-CoV-2 VOCs in mucosal samples.**

**A-B.** RBD-specific IgA (**A**) and IgG (**B**) titers in VLF after the 2nd and 3rd immunizations. **C-D.** Neutralizing antibody titers against authentic SARS-CoV-2 VOCs in the BALF (**C**) or NLF (**D**) after the 2nd immunization. The data are presented as the means ± SEMs and are representative of at least three independent experiments. Groups were compared via ordinary one-way ANOVA or the Kruskal-Wallis test. **P*<0.05, ***P*<0.01; ns, nonsignificant.

**Fig. S5. Evaluation of the depletion efficiency of CD8+ T cells.**

**A**. Representative dot plots (left) and frequency (right) of CD8+ T cells in the blood. The data are presented as the means ± SEMs and are representative of at least three independent experiments. Groups were compared via unpaired two-sided Student’s *t*-test. *****P*<0.0001.

**Figure S6. S-2P effectively activated innate immunity.**

**A.** Enriched pathways associated with genes whose expression was upregulated in the lung tissues of mice intranasally immunized with S-2P. B Upregulation of type I IFN-related genes in BMDCs stimulated with S-2P but not HA. The data are presented as the means ± SEMs. Groups were compared via one-way ANOVA or the Kruskal-Wallis test. **P*<0.05; ***P*<0.01; ****P*<0.001; *****P*<0.0001; ns, nonsignificant.

**Supplementary figures**


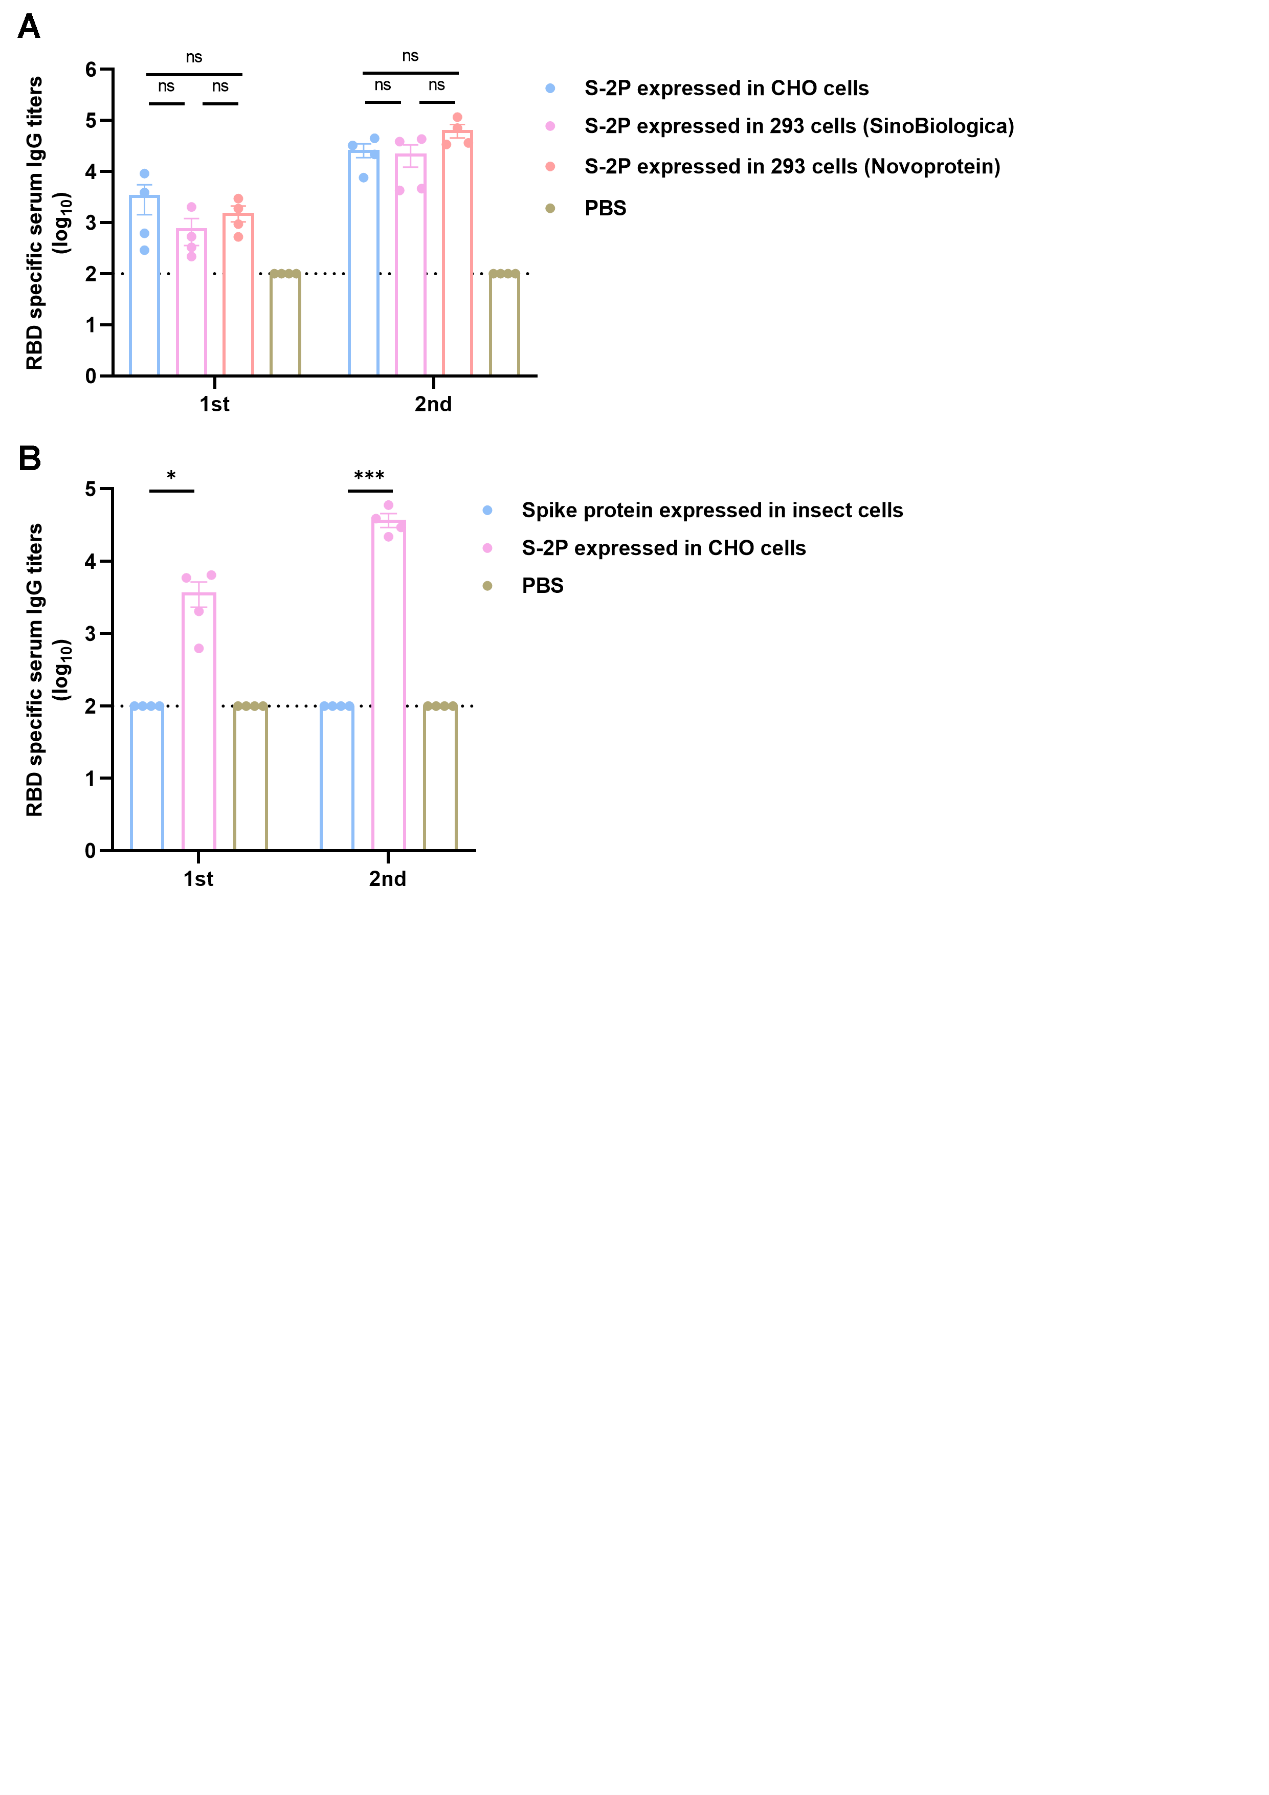


**Fig. S1. Comparison of the immunogenicity of S-2P produced from different protein expression systems.**


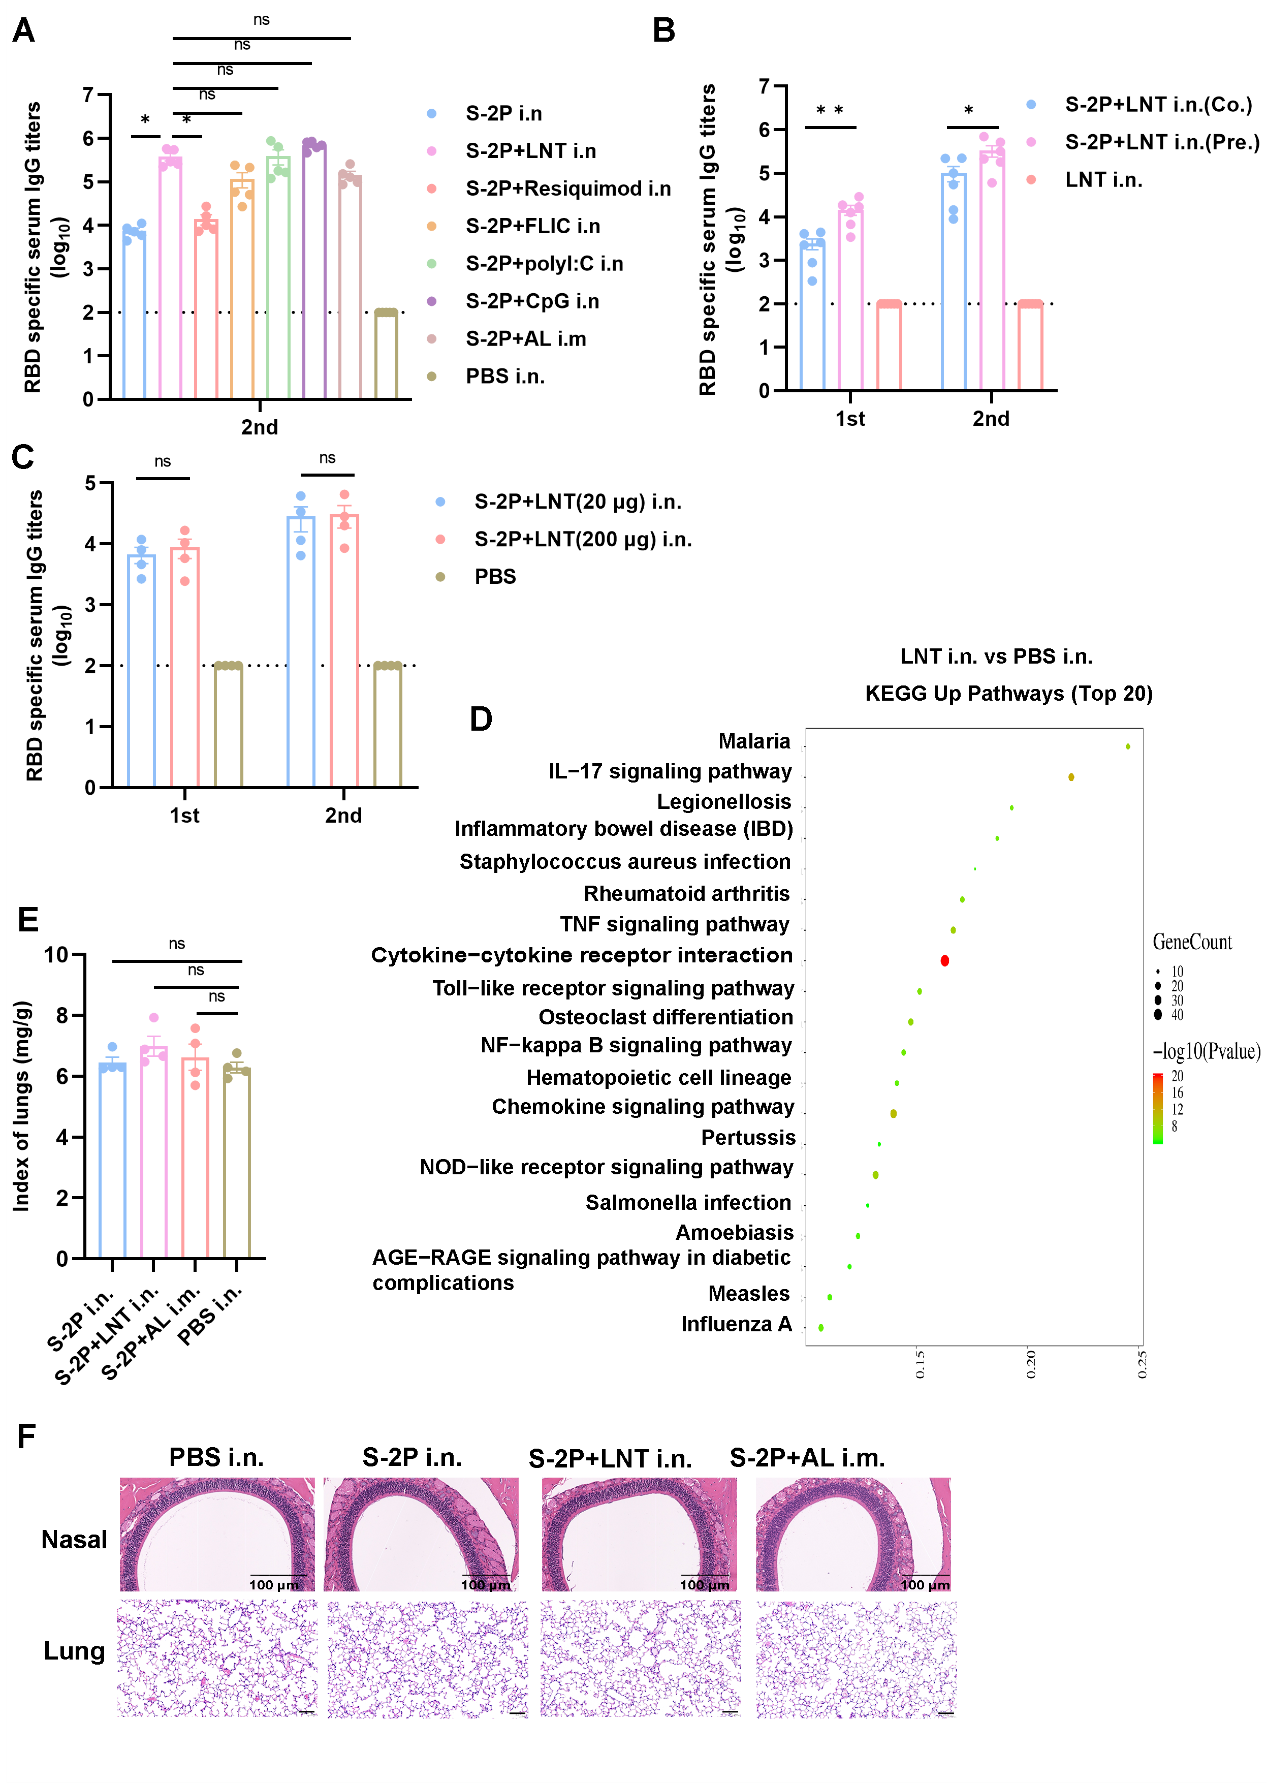


**Fig. S2. Effectiveness and biocompatibility of LNT as a respiratory mucosal adjuvant.**


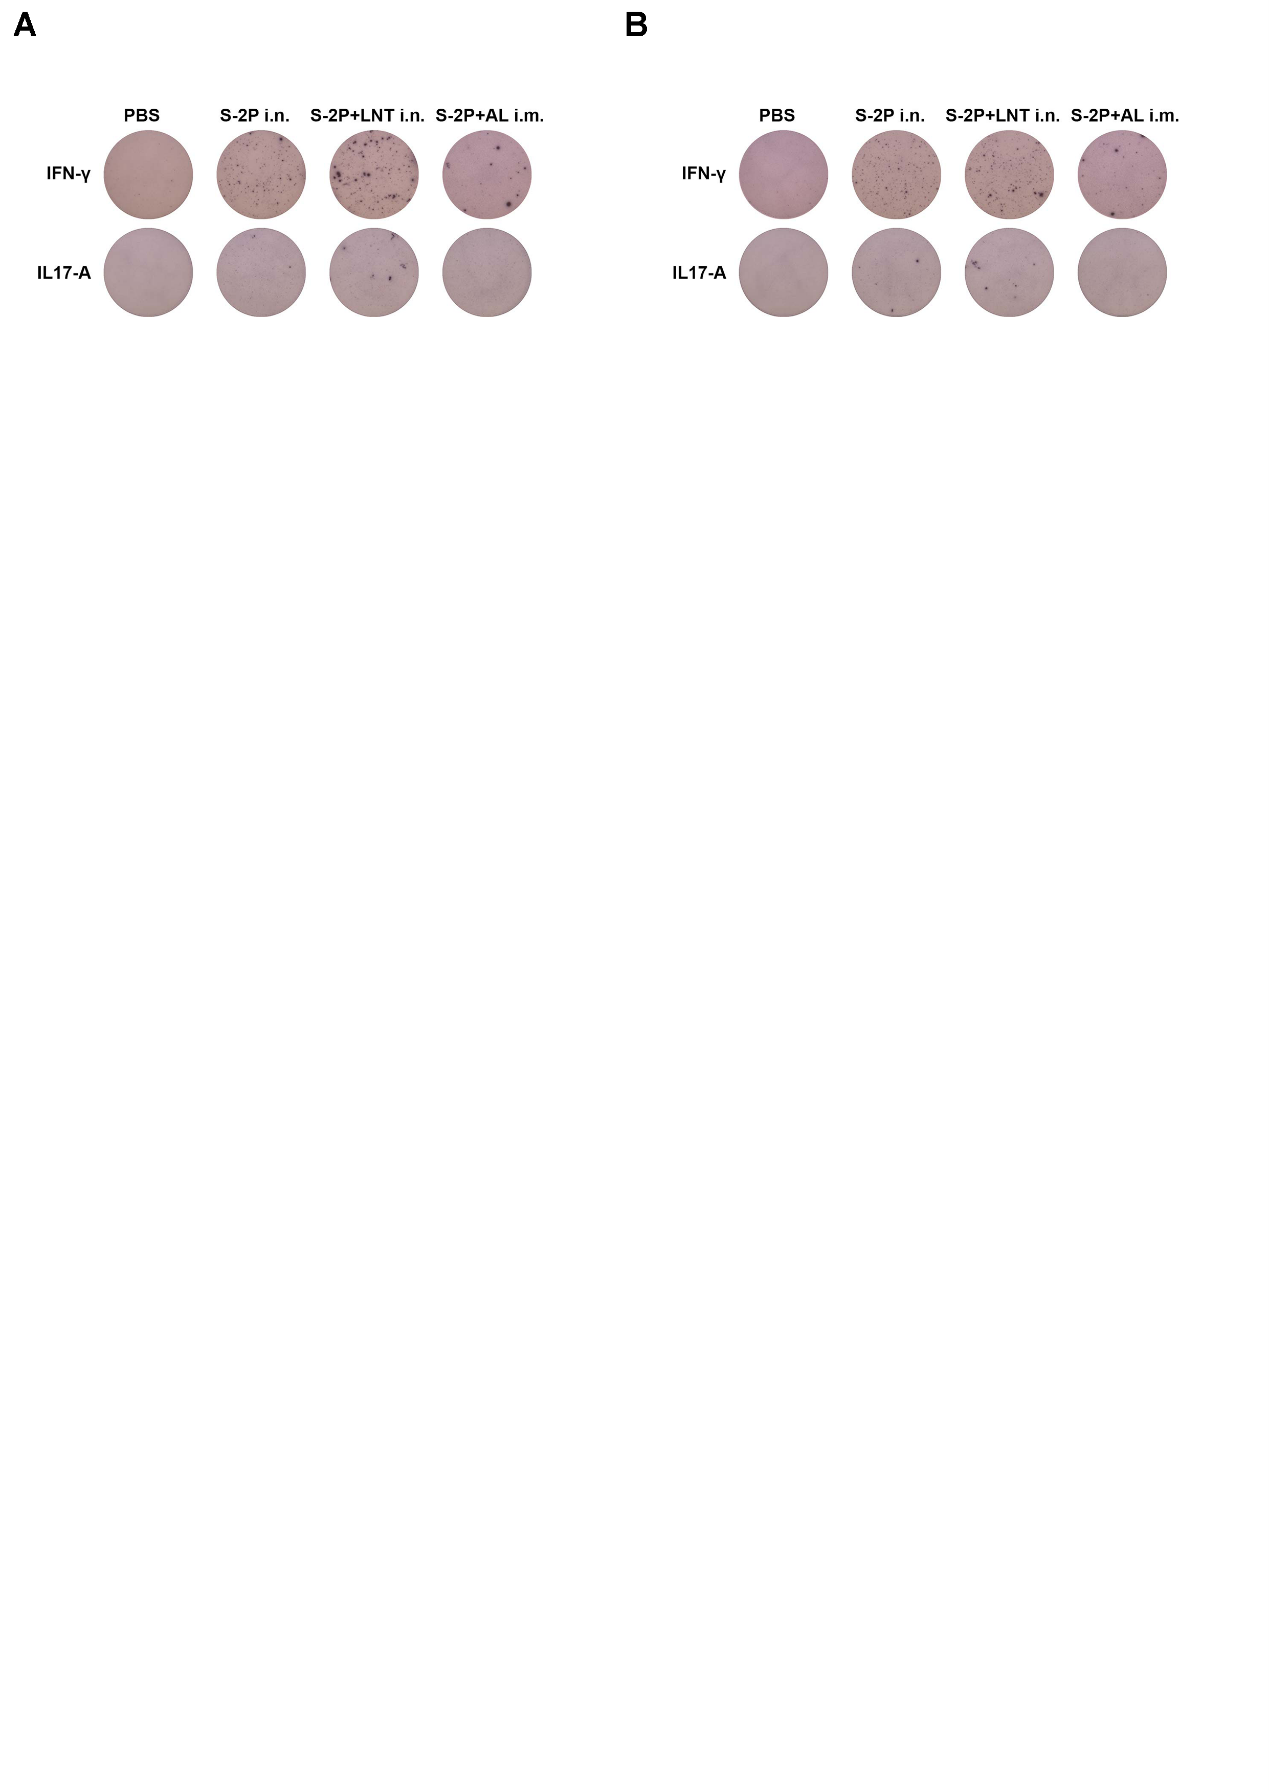


**Fig. S****3. S1- or S2-specific IFN-γ- and IL-17A-secreting T-cell responses of spleen cells.**


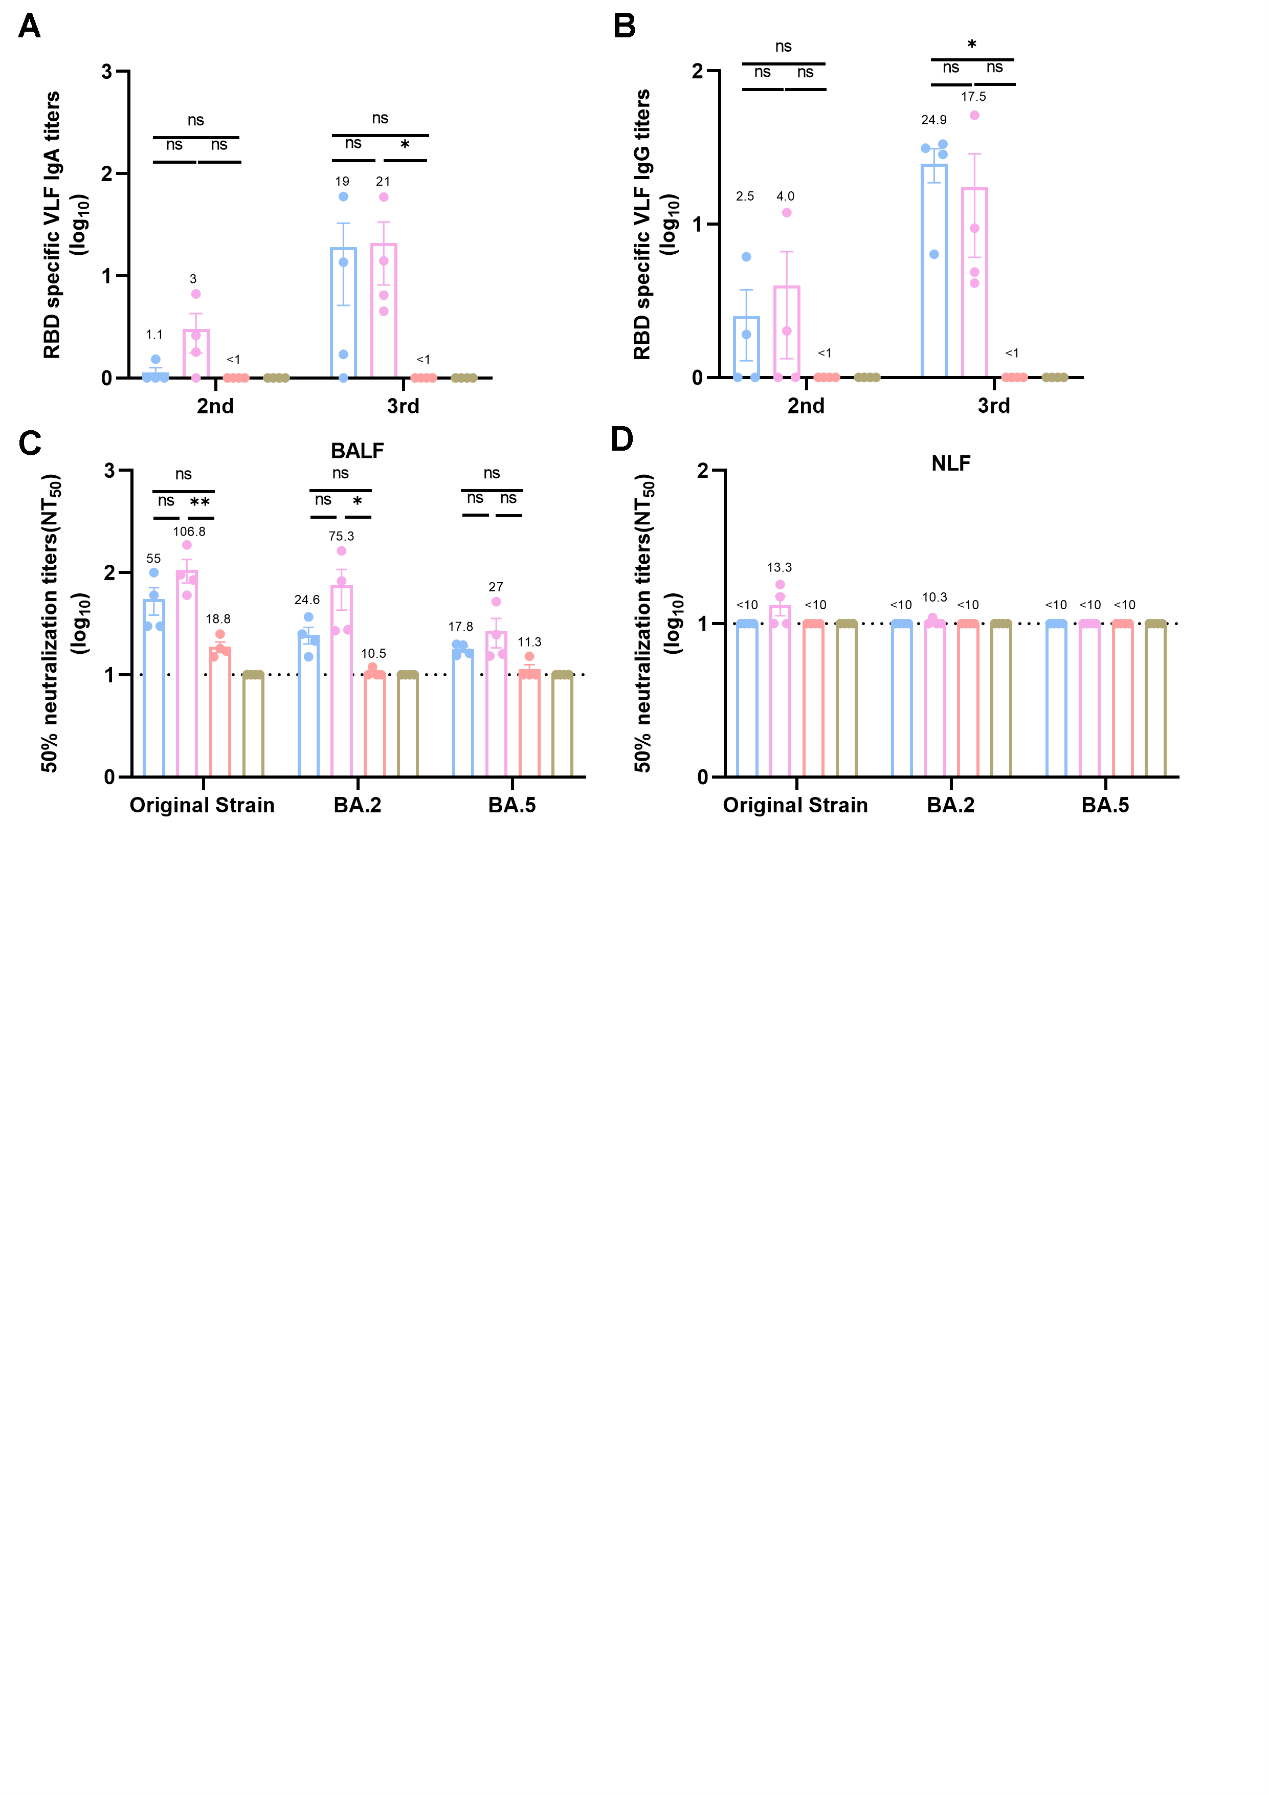


**Fig. S****4. Neutralizing antibody titers against authentic SARS-CoV-2 VOCs in mucosal samples.**


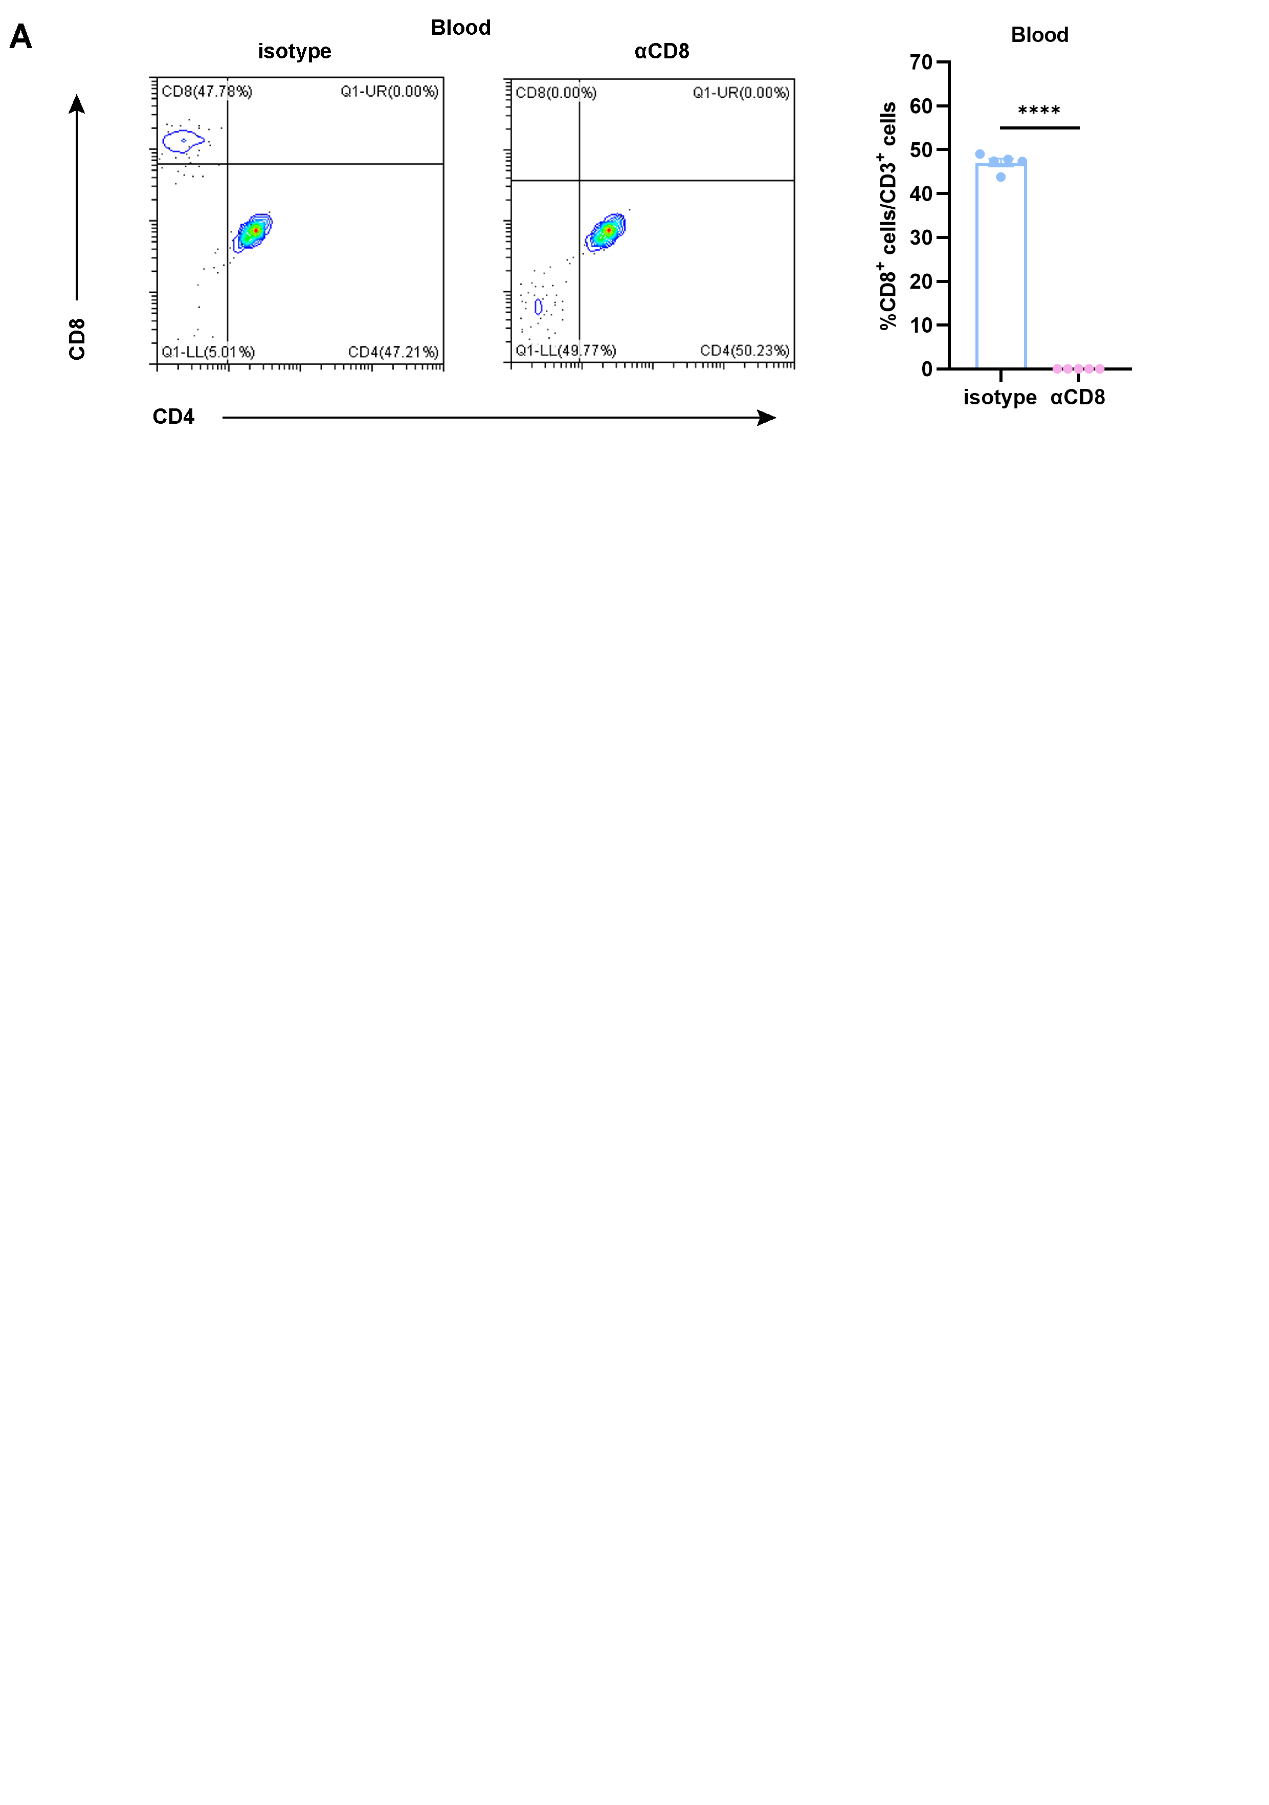


**Fig. S5. Evaluation of the** **depletion efficiency of CD8+ T cells.**


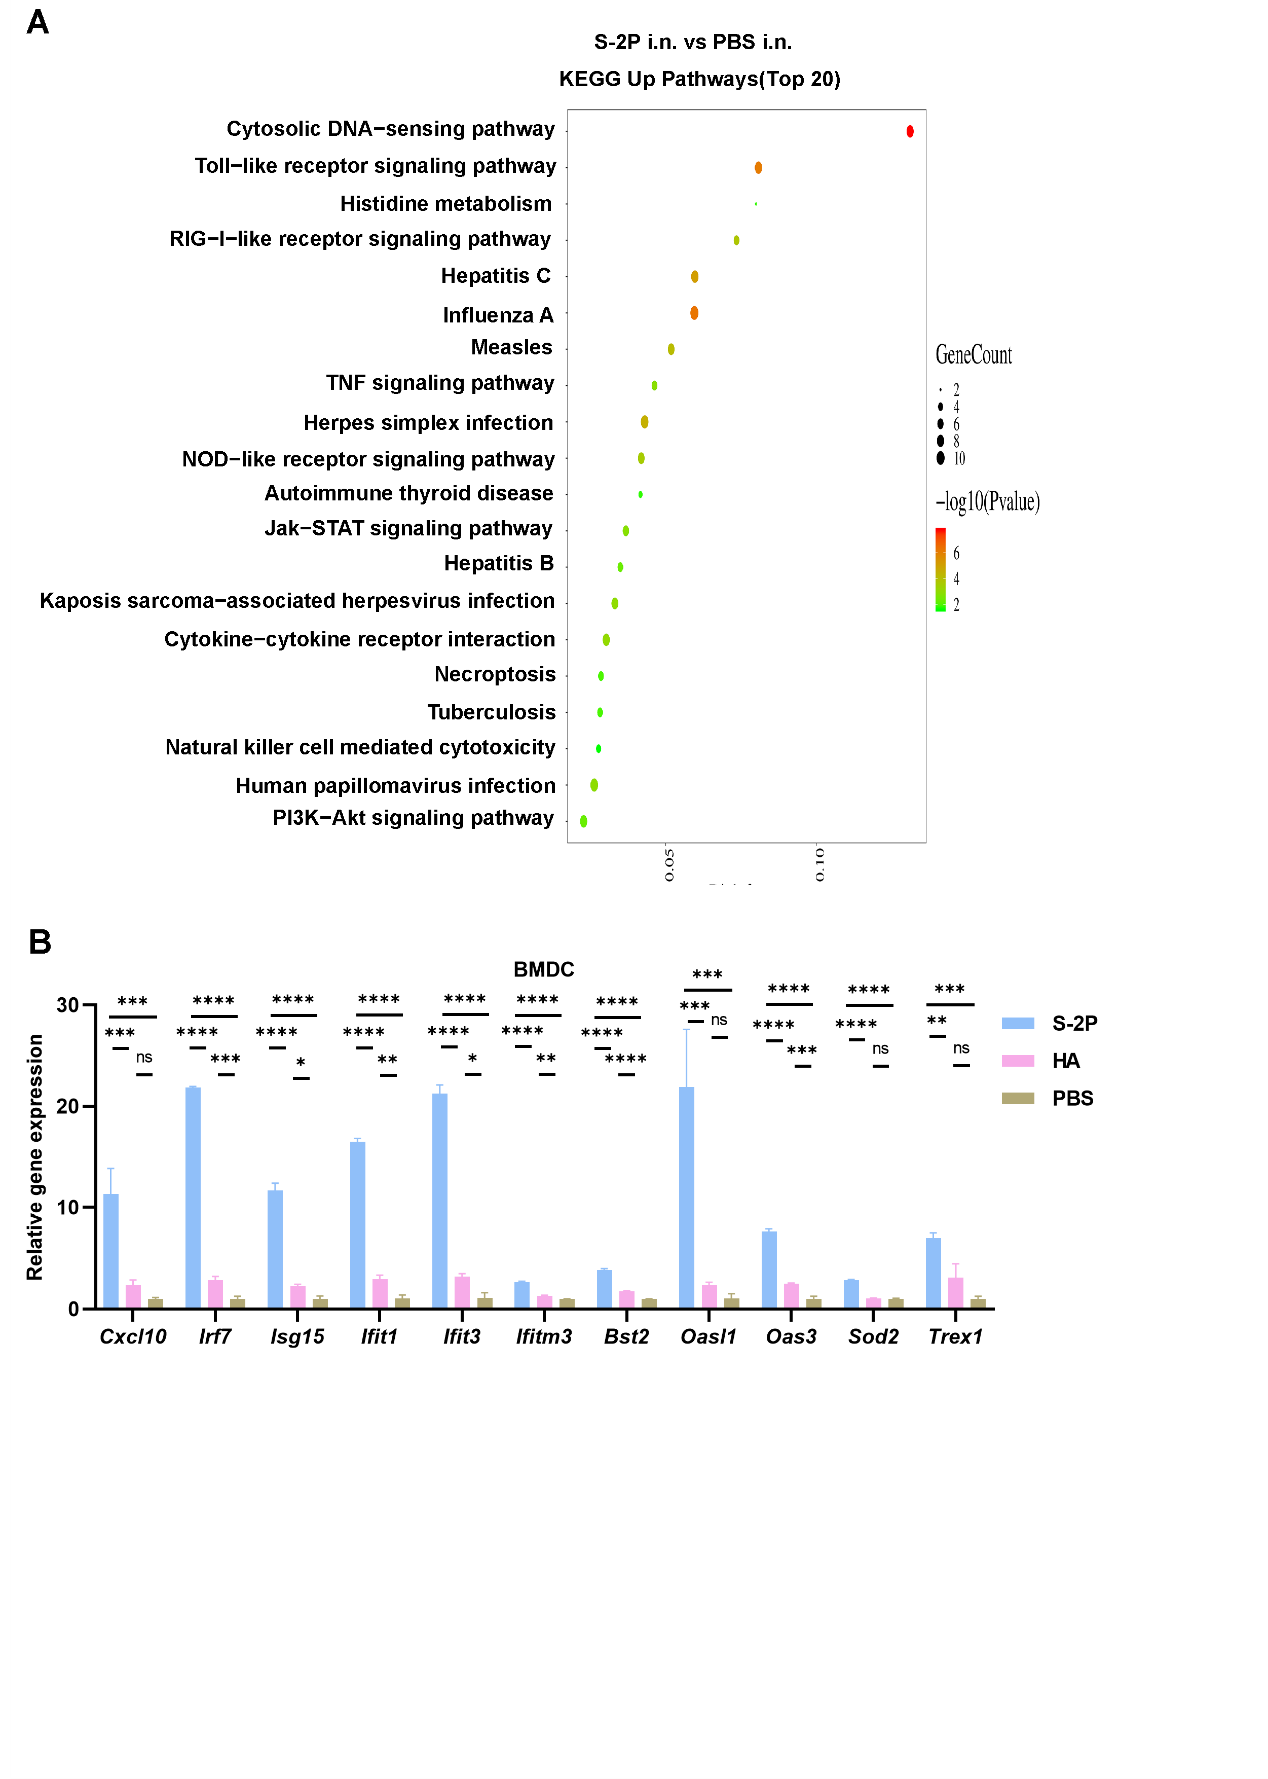


**Fig. S6. S-2P effectively activated innate immunity.**
